# Supplementary material for: Linezolid Resistance Genes and Mutations among Linezolid-Susceptible Enterococcus spp.—A Loose Cannon?
Source: MDPI journal article supplement (doi:10.3390/antibiotics13010101), 2024-01-19
Supplement: s1 [file s1]

## Supplementary material

Table S1. *E. faecium* (n=7) and *E. faecalis* (n=5) isolates used in LIN selective pressure experiments and selected from isolates with a LIN MIC of 4mg/L (in BMD) collected at the NRC, 2019-2021.

| Isolate   | Species            | LIN resistance mutation or LIN resistance gene content | Final LIN MIC [mg/L], experiment 1 <sup>1</sup> | Final LIN MIC [mg/L], experiment 2 <sup>1</sup> |
|-----------|--------------------|--------------------------------------------------------|-------------------------------------------------|-------------------------------------------------|
| UW19609   | <i>E. faecium</i>  | None                                                   | 2                                               | 2                                               |
| UW20036   | <i>E. faecium</i>  | G2576T                                                 | 16                                              | 16                                              |
| UW19892   | <i>E. faecium</i>  | <i>poxA</i>                                            | 8                                               | 16                                              |
| UW21529   | <i>E. faecium</i>  | <i>cfr</i>                                             | 2                                               | 2                                               |
| UW22166   | <i>E. faecium</i>  | <i>optrA</i>                                           | 1 <sup>2</sup>                                  | 1 <sup>2</sup>                                  |
| UW22402   | <i>E. faecium</i>  | <i>optrA</i> & <i>poxA</i>                             | 2                                               | 2                                               |
| UW21431   | <i>E. faecium</i>  | <i>poxA</i>                                            | 16                                              | 16                                              |
| UW22498   | <i>E. faecalis</i> | None                                                   | 4                                               | 2                                               |
| UW20543   | <i>E. faecalis</i> | G2576T                                                 | 2                                               | 1                                               |
| UW22208   | <i>E. faecalis</i> | <i>optrA</i>                                           | 2                                               | 4                                               |
| UW21555   | <i>E. faecalis</i> | <i>optrA</i>                                           | 4                                               | 8                                               |
| UW20493   | <i>E. faecalis</i> | <i>optrA</i>                                           | 4                                               | 4                                               |
| UW21148   | <i>E. faecium</i>  | G2576T; positive control from NRC strain collection    | 16                                              | 16                                              |
| UW23555   | <i>E. faecalis</i> | G2576T; positive control from NRC strain collection    | 32                                              | 16                                              |
| ATCC29212 | <i>E. faecalis</i> | None; negative control from NRC strain collection      | 0.5                                             | 0.5                                             |

<sup>1</sup>LIN MIC assessed by broth microdilution method; <sup>2</sup>isolate that had lost the resistance gene after LIN selective pressure
